# Supplementary material for: Spatial biomonitoring of persistent organic pollutants in Iran: a study using locally produced butter
Source: Royal Society of Chemistry journal article supplement (doi:10.1039/b802061b), 2008-01-01
Supplement: b802061b.pdf [file b802061b.pdf]

## Supporting information

### List of Figures and Tables

Figure SI-1: Population density across Iran

Figure SI-2: Land use and distribution of agricultural products in Iran

Figure SI-3: Political map of Iran covering the study area.

Figure SI-4: The number and location of sampling sites in Iran.

Figure SI-5: Distribution of HCHs in Iran. Higher  $\alpha/\gamma$ -HCH ratios indicate the application of technical HCH.

Figure SI-6: Concentrations of HCB in individual butter samples across Iran. HCB concentration is highest in industrial cities suburbs, namely Tehran and Isfahan.

Table SI-1: Sample locations and descriptions.

Table SI-2: Organochlorine pesticides in the butter samples ( $\text{pg g}^{-1}$  lipid) (empty cells stand for concentrations below MDL).

Table SI-3: PCB congeners in the butter samples ( $\text{pg g}^{-1}$  lipid) (empty cells stand for concentrations below MDL).

Figure SI-1

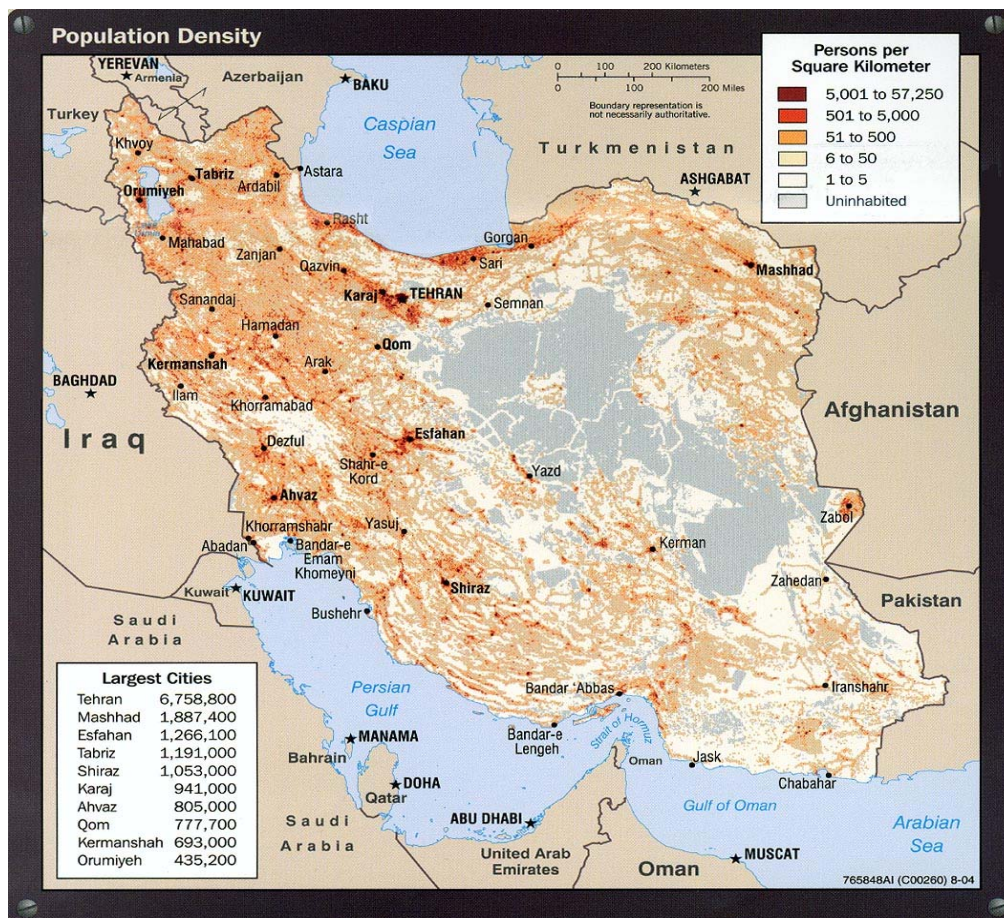

Figure SI-2.

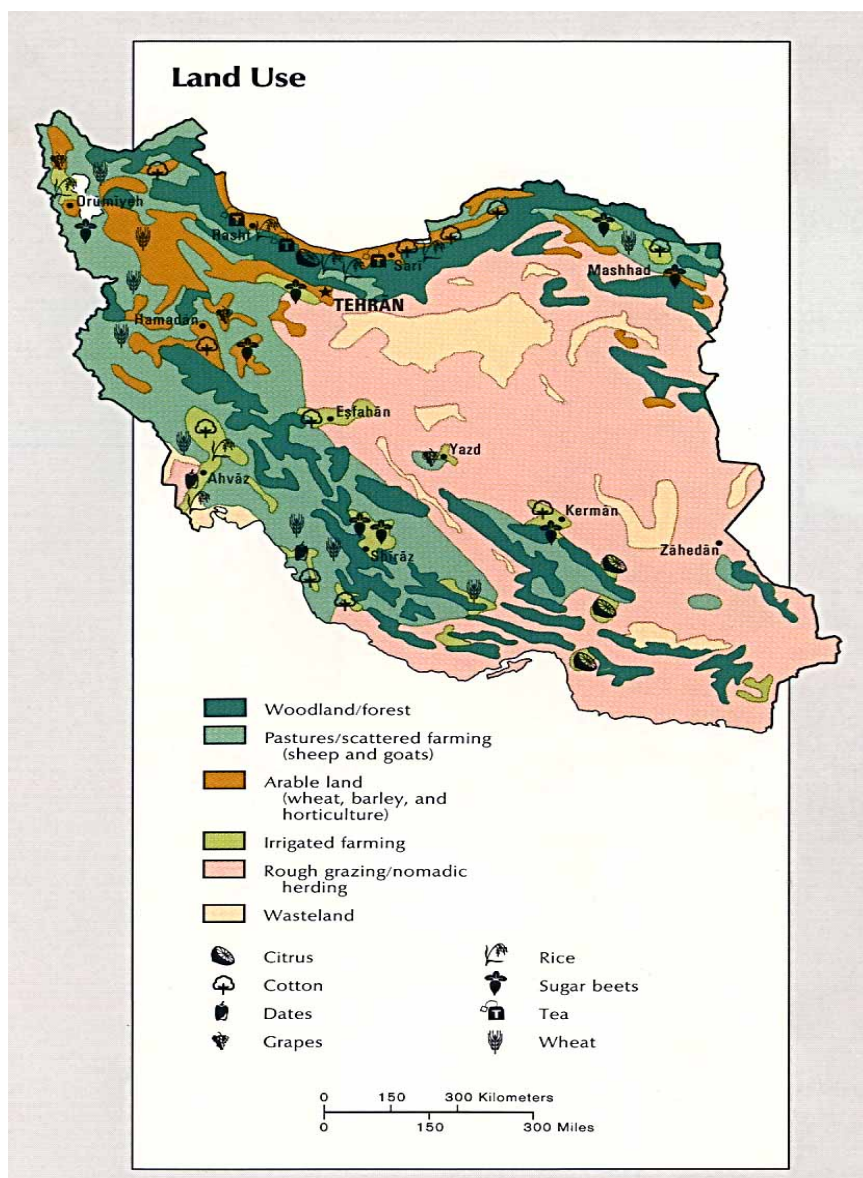

Figure SI-3.

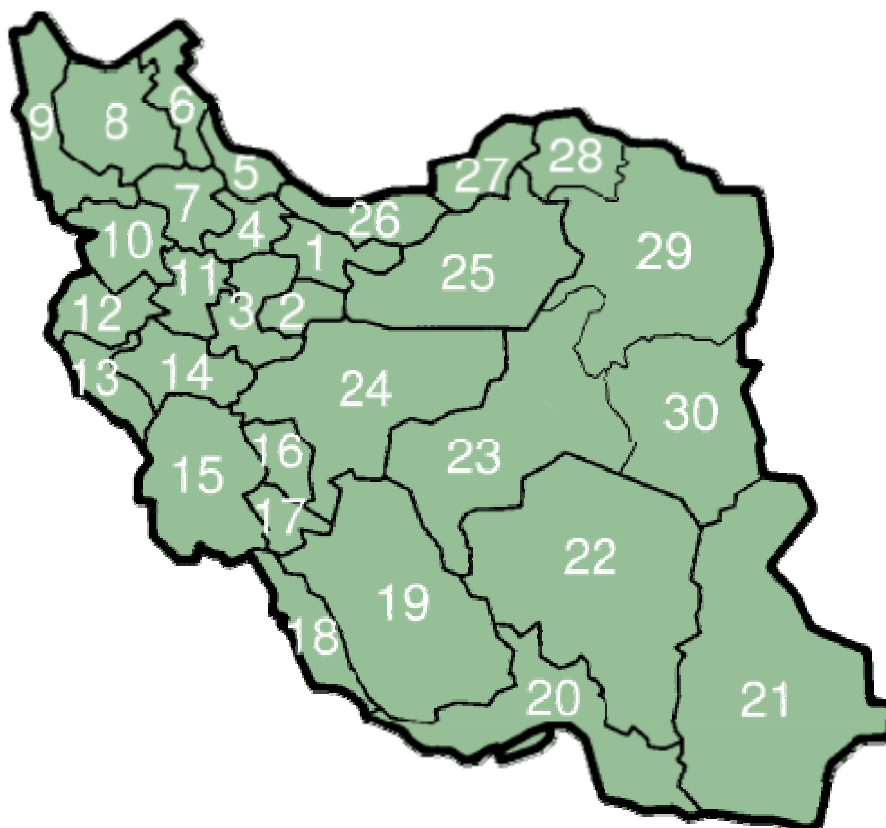

Map accessed from <http://en.wikipedia.org/wiki/Iran> on 18.08.2007

Numbers in the map refer to individual provinces. The study area includes the provinces of E.Azarbaijan (8), W.Azarbaijan (9), Zanjan (7), Gilan (5), Ghazvin (4), Mazandaran (26), Tehran (1), Markazi (3), Qom (2), Isfahan (24), Chaharmahal and Bakhtiari (16), Razavi Khorasan (29).

Figure SI-4.

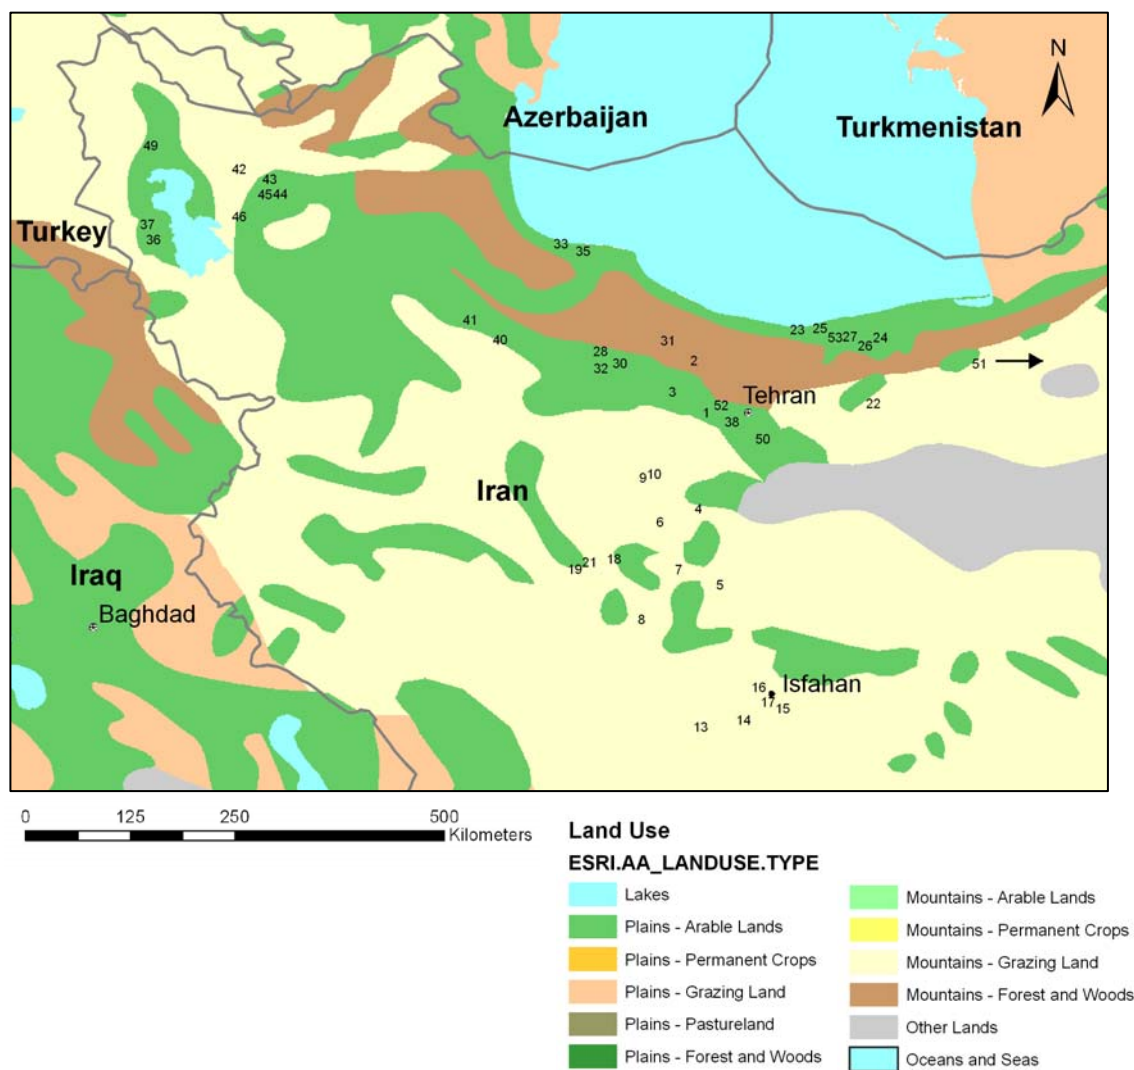

Some of the sampling sites overlap due to their proximity to each other (e.g., site 20 in vicinity of sites 19 and 21); site 51 is outside the area shown in this map (see Figure 1).

Figure SI-5.

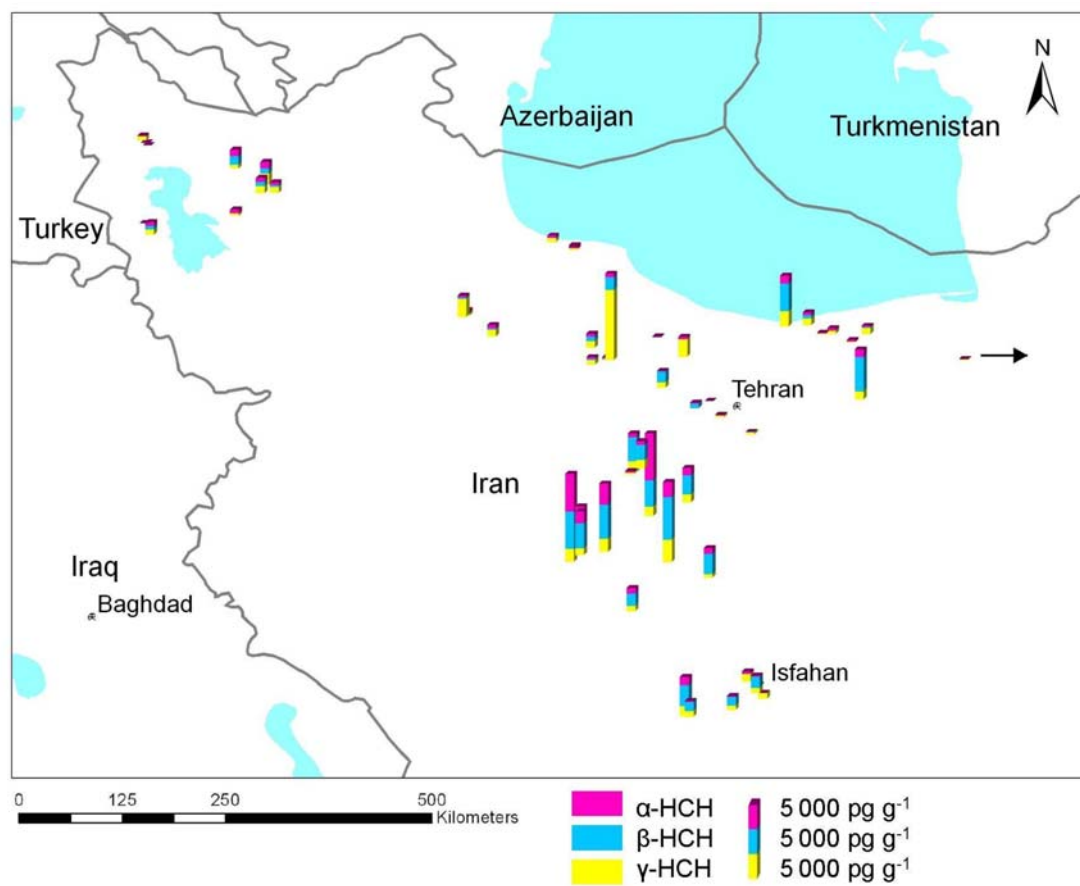

Figure SI-6.

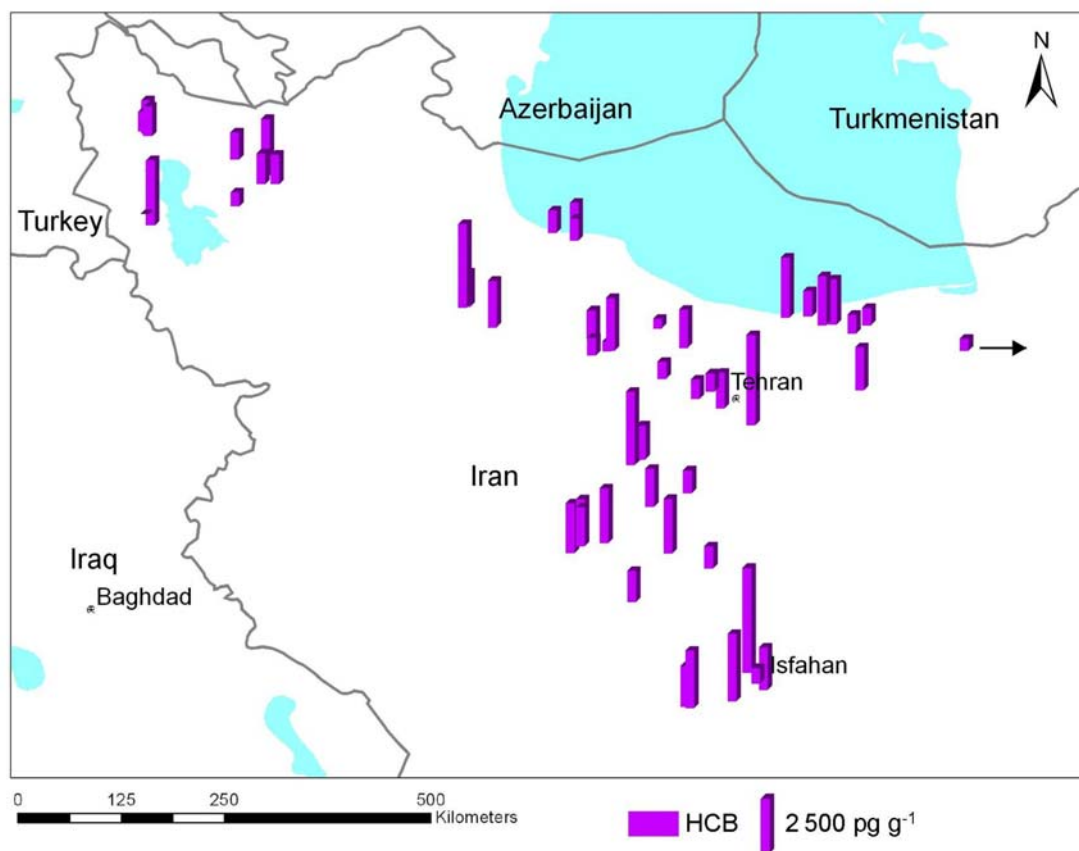

Table SI-1.

| Sample No. | Sampling site          | Site Description      | Sample No. | Sampling site                | Site Description      |
|------------|------------------------|-----------------------|------------|------------------------------|-----------------------|
| 1          | Safadasht-Karaj        | Agricultural          | 28         | Aghababa-Ghazvin             | Rural                 |
| 2          | Karaj(Suburbs)         | Large industrial city | 29         | Dasht e Abi-Alvand           | Agricultural          |
| 3          | Tankaran-Hahtgerd      | Rural                 | 30         | Nowrabad-Alvand              | Industrial            |
| 4          | Jamkaran-Ghom          | Suburban              | 31         | Hir-Alamot                   | Rural                 |
| 5          | Varcheh- Khomein       | Rural                 | 32         | Ghaghazan-Ghazvin            | Rural                 |
| 6          | Salafchehan            | Rural                 | 33         | Bander e Anzali              | Urban                 |
| 7          | Delijan                | Agricultural          | 34         | Khoman-2 Raht                | Suburban              |
| 8          | Saeedabad-Golpaygan    | Suburban              | 35         | Khoman-1 Raht                | Suburban              |
| 9          | Saveh(suburbs)         | Industrial            | 36         | Uroumia                      | Urban                 |
| 10         | Ahmadabad-Saveh        | Suburban              | 37         | Chongharalay-Uroumia         | Rural                 |
| 11         | Assiabak band-Saveh    | Rural                 | 38         | Islamshahr-Tehran            | Urban                 |
| 12         | Shahrekor(suburbs) 1   | Agricultural          | 39         | Zanjan suburbs               | Suburban              |
| 13         | Shahrekor(suburbs) 2   | Agricultural          | 40         | Moshkabad-Zanjan             | Suburban              |
| 14         | Zarrin shahr-Isfahan   | Suburban-Industrial   | 41         | Dolanab-Zanjan               | Suburban              |
| 15         | Margh-Isfahan          | Suburban              | 42         | Soufian-Tabriz               | Suburban              |
| 16         | Adrym-Isfahan          | Suburban-Industrial   | 43         | Tabriz                       | Large industrial city |
| 17         | Abriham shahr-Isfahan  | Suburban-Industrial   | 44         | Basmenj-Tabriz               | Suburban              |
| 18         | Kheirabad-Arak         | Suburban-Industrial   | 45         | Zarnagh-Tabriz               | Suburban              |
| 19         | Govar-Arak             | Suburban              | 46         | Azarshahr-Tabriz             | Suburban              |
| 20         | Hassanabad-Arak(1)     | Suburban              | 47         | Bolamaj-Khoy                 | Rural                 |
| 21         | Nazmabad-Arak(2)       | Suburban              | 48         | Sarab-Khoy                   | Rural                 |
| 22         | Firouzkooh             | Agricultural          | 49         | Bakhtiar-Khoy                | Suburban              |
| 23         | Rooyan(Alamdeh)        | Suburban              | 50         | Saadabad-Gharchak            | Suburban-Industrial   |
| 24         | Nezami road-Ghsemshahr | Suburban              | 51         | Commercial butter-Neishabocr | Semi-Industrial       |
| 25         | Berjendeh-Mahmoodabad  | Suburban              | 52         | Commercial butter-Tehran     | Industrial            |
| 26         | Galoogah-Babol         | Rural                 | 53         | Commercial butter-Amol       | Industrial            |
| 27         | Amol(suburbs)          | Semi-Industrial       |            |                              |                       |



Table SI-2.

| Sample | HCB  | op'-DDD | pp'-DDD | op'-DDE | pp'-DDE | op'-DDT | pp'-DDT | ΣDDT   | pp'-DDT/pp'-DDE | α-HCH | β-HCH | γ-HCH | ΣHCH  | α/γ-HCH |
|--------|------|---------|---------|---------|---------|---------|---------|--------|-----------------|-------|-------|-------|-------|---------|
| 1      | 922  |         | 356     |         | 11128   |         | 2182    | 13667  | 0.20            | 187   | 877   |       | 1064  |         |
| 2      | 1782 |         | 1404    | 60      | 30781   | 265     | 3847    | 36297  | 0.12            | 448   |       | 3613  | 4061  | 0.12    |
| 3      | 795  |         | 189     |         | 15334   | 45      | 408     | 15975  | 0.03            | 95    | 2186  | 1130  | 3412  | 0.08    |
| 4      | 1074 | 555     | 13867   | 398     | 105838  | 423     | 21167   | 141295 | 0.20            | 1461  | 3844  | 1626  | 6931  | 0.90    |
| 5      | 1033 |         | 1672    |         | 56224   | 62      | 2266    | 60224  | 0.04            | 1099  | 4121  | 716   | 5936  | 1.54    |
| 6      | 1771 | 285     | 6940    | 829     | 174491  | 771     | 48673   | 230876 | 0.28            | 9445  | 5345  | 1870  | 16660 | 5.05    |
| 7      | 2539 | 3473    | 107998  | 1476    | 402590  | 1417    | 94635   | 606639 | 0.24            | 2979  | 8644  | 4574  | 16198 | 0.65    |
| 8      | 1465 | 592     | 19169   | 283     | 56715   | 310     | 19138   | 95331  | 0.34            | 1099  | 2452  | 1128  | 4679  | 0.97    |
| 9      | 1450 | 270     | 8949    | 627     | 54835   | 168     | 8864    | 72817  | 0.16            | 695   | 4893  | 2150  | 7739  | 0.32    |
| 10     | 1584 | 161     | 4077    | 378     | 35903   | 182     | 5730    | 45893  | 0.16            | 740   | 3025  | 1745  | 5509  | 0.42    |
| 11     | 3426 |         | 357     |         | 9656    |         | 686     | 10699  | 0.07            | 273   |       | 367   | 639   | 0.74    |
| 12     | 1904 | 694     | 21268   | 1331    | 200128  | 955     | 32335   | 254686 | 0.16            | 1603  | 4261  | 1949  | 7812  | 0.82    |
| 13     | 2672 | 84      | 1155    | 97      | 26505   | 151     | 1629    | 29440  | 0.06            | 171   | 1830  | 1229  | 3229  | 0.14    |
| 14     | 3151 | 424     | 8390    | 150     | 41100   | 630     | 9859    | 59979  | 0.24            | 196   | 1741  | 928   | 2865  | 0.21    |
| 15     | 1980 |         | 470     |         | 4913    | 114     | 1270    | 6767   | 0.26            |       |       | 1195  | 1195  | 0.00    |
| 16     | 4895 | 57      | 1259    | 88      | 23097   |         | 2222    | 26578  | 0.10            | 492   |       | 1585  | 2077  | 0.31    |
| 17     | 733  | 74      | 1658    | 101     | 18452   | 75      | 2086    | 22270  | 0.11            | 222   | 2272  | 951   | 3445  | 0.23    |
| 18     | 2551 | 761     | 20616   | 862     | 153329  | 64      | 30926   | 204935 | 0.20            | 4278  | 6884  | 2666  | 13829 | 1.60    |
| 19     | 2326 | 471     | 13067   | 148     | 80912   | 225     | 14066   | 108270 | 0.17            | 7579  | 7554  | 2657  | 17790 | 2.85    |
| 20     | 2196 | 80      | 1654    | 107     | 39605   | 118     | 2693    | 44070  | 0.07            | 2488  | 6467  | 888   | 9843  | 2.80    |
| 21     | 1815 | 808     | 23220   | 326     | 107285  | 357     | 15091   | 145953 | 0.14            | 2360  | 5091  | 1376  | 8827  | 1.71    |
| 22     | 2014 | 60      | 1538    |         | 31322   | 139     | 2278    | 35278  | 0.07            | 1420  | 6980  | 1634  | 10034 | 0.87    |
| 23     | 2801 |         | 758     |         | 11356   | 91      | 1093    | 13297  | 0.10            | 1572  | 5562  | 3120  | 10254 | 0.50    |
| 24     | 803  |         | 318     |         | 7699    |         | 269     | 8287   | 0.03            | 202   | 187   | 1315  | 1704  | 0.15    |
| 25     | 1189 | 98      | 3424    | 58      | 31133   | 154     | 4001    | 38713  | 0.13            | 532   | 612   | 1448  | 2592  | 0.37    |
| 26     | 888  | 55      | 114     |         | 9637    |         | 166     | 9918   | 0.02            | 268   |       | 243   | 512   | 1.10    |

Table SI-2, continued.

| Sample | HCB  | op'-DDD | pp'-DDD | op'-DDE | pp'-DDE | op'-DDT | pp'-DDT | ΣDDT   | pp'-DDT/pp'-DDE | α-HCH | β-HCH | γ-HCH | ΣHCH  | α/γ-HCH |
|--------|------|---------|---------|---------|---------|---------|---------|--------|-----------------|-------|-------|-------|-------|---------|
| 27     | 2125 | 94      | 377     |         | 15858   | 80      | 571     | 16886  | 0.04            | 473   |       | 618   | 1091  | 0.77    |
| 28     | 1342 | 306     | 8010    | 96      | 37451   | 133     | 10017   | 55632  | 0.27            | 567   | 925   | 1416  | 2908  | 0.40    |
| 29     | 460  |         | 190     |         | 6343    | 45      | 194     | 6972   | 0.03            | 219   | 176   | 201   | 596   | 1.09    |
| 30     | 2463 | 217     | 6253    | 55      | 48419   | 78      | 4406    | 59156  | 0.09            | 700   | 2581  | 14124 | 17404 | 0.03    |
| 31     | 453  | 327     | 8339    | 202     | 57946   | 160     | 7890    | 74336  | 0.14            | 113   | 77    |       | 189   |         |
| 32     | 830  |         | 1025    |         | 4954    |         | 1487    | 7466   | 0.30            | 289   | 283   | 928   | 1500  | 0.31    |
| 33     | 1042 |         | 192     |         | 5958    |         | 144     | 6295   | 0.02            | 416   | 133   | 699   | 1249  | 0.59    |
| 34     | 1763 |         | 381     |         | 21623   |         | 504     | 22508  | 0.02            | 345   | 370   | 200   | 916   | 1.72    |
| 35     | 1019 |         | 412     |         | 10415   |         | 862     | 11688  | 0.08            | 225   |       | 281   | 506   | 0.80    |
| 36     | 3040 | 220     | 6497    | 113     | 106696  | 144     | 9544    | 122880 | 0.09            | 810   | 705   | 972   | 2487  | 0.83    |
| 37     |      |         |         | 115     | 1096    |         | 97      | 1192   | 0.09            |       |       |       |       |         |
| 38     | 1661 | 138     | 241     | 51      | 12910   |         | 974     | 14125  | 0.08            | 84    |       | 395   | 479   | 0.21    |
| 39     | 1605 | 366     | 8949    | 72      | 19411   | 312     | 11941   | 40614  | 0.62            | 504   | 128   | 522   | 1154  | 0.96    |
| 40     | 2182 | 125     | 2348    |         | 10218   | 87      | 2523    | 15175  | 0.25            | 582   | 302   | 1402  | 2286  | 0.42    |
| 41     | 3903 |         | 1930    |         | 30460   | 134     | 1010    | 33534  | 0.03            | 362   | 253   | 3665  | 4280  | 0.10    |
| 42     | 1260 |         | 651     |         | 7658    |         | 2234    | 10543  | 0.29            | 1291  | 1726  | 760   | 3778  | 1.70    |
| 43     | 2638 | 477     | 12151   | 141     | 95730   | 44      | 14073   | 121998 | 0.15            | 1273  | 959   | 2305  | 4538  | 0.55    |
| 44     | 1363 | 199     | 5678    | 97      | 34246   | 109     | 7033    | 47065  | 0.21            | 591   | 374   | 1196  | 2160  | 0.49    |
| 45     | 1435 |         | 8890    | 77      | 24043   |         | 9535    | 42468  | 0.40            | 800   | 791   | 1494  | 3085  | 0.54    |
| 46     | 656  | 72      | 3782    |         | 11876   |         | 1006    | 16664  | 0.08            | 699   |       | 460   | 1159  | 1.52    |
| 47     | 1564 |         | 7950    |         | 4313    | 508     | 2638    | 15408  | 0.61            | 89    |       |       | 89    |         |
| 48     | 935  |         | 1093    | 53      | 11493   | 48      | 1855    | 14489  | 0.16            | 108   |       | 850   | 958   | 0.13    |
| 49     | 1386 |         | 251     |         | 5873    | 97      | 349     | 6570   | 0.06            |       |       |       |       |         |
| 50     | 4220 | 66      | 2330    | 74      | 12977   | 79      | 4111    | 19498  | 0.32            |       | 87    | 409   | 496   |         |
| 51     | 581  |         |         |         | 663     |         |         | 663    |                 |       |       | 164   | 164   |         |
| 52     | 861  |         |         |         | 3931    |         |         | 3931   |                 |       |       |       |       |         |
| 53     | 2300 |         | 139     |         | 3849    | 57      | 144     | 4189   | 0.04            | 76    |       | 214   | 289   | 0.35    |

Table SI-3.

| Sample | PCB congeners |     |       |       |     |     |     |    |    |     |    |       |     |     |     |     |     |     |     |      |    |
|--------|---------------|-----|-------|-------|-----|-----|-----|----|----|-----|----|-------|-----|-----|-----|-----|-----|-----|-----|------|----|
|        | 18            | 22  | 28+31 | 41+64 | 44  | 49  | 52  | 54 | 70 | 74  | 87 | 90+10 | 95  | 99  | 104 | 105 | 110 | 114 | 118 | 123  |    |
| 1      |               |     |       |       |     |     |     |    |    | 411 |    |       |     | 109 |     | 74  |     |     |     | 263  |    |
| 2      | 59            |     | 263   |       |     | 67  | 56  |    | 29 | 233 |    |       | 53  | 131 |     | 92  |     |     |     | 320  |    |
| 3      | 55            |     | 123   |       |     | 28  | 27  |    | 24 | 65  |    |       |     | 54  |     | 43  |     |     |     | 137  |    |
| 4      | 45            |     | 292   | 83    | 101 | 76  | 78  |    | 96 | 148 | 55 | 211   | 224 | 84  |     | 88  | 142 |     |     | 226  | 30 |
| 5      | 127           |     | 254   |       |     | 83  | 48  |    |    | 85  |    |       |     | 58  |     | 65  |     |     |     | 205  |    |
| 6      | 131           | 117 | 413   | 76    |     | 72  | 85  |    | 67 | 404 |    | 58    | 78  | 153 |     | 114 | 32  |     |     | 337  |    |
| 7      | 227           |     | 342   |       |     | 91  | 95  |    | 38 | 159 |    | 61    | 84  | 144 |     | 134 | 39  |     |     | 419  | 27 |
| 8      | 102           | 77  | 324   |       | 40  | 39  | 46  |    | 31 | 53  |    |       |     | 29  |     | 27  |     |     |     | 108  |    |
| 9      | 180           | 120 | 374   | 93    | 127 | 93  | 79  |    | 39 | 316 |    | 68    | 93  | 192 |     | 141 | 38  |     |     | 477  |    |
| 10     | 63            |     | 172   |       |     | 41  | 33  |    |    | 171 |    |       |     | 102 |     | 134 |     |     |     | 316  |    |
| 11     |               |     | 147   |       |     |     |     |    |    | 159 |    |       |     | 94  |     | 88  |     |     |     | 273  |    |
| 12     | 203           | 90  | 387   | 74    | 65  | 115 | 109 |    | 45 | 97  |    | 79    | 130 | 40  |     | 33  | 38  |     |     | 97   |    |
| 13     | 179           | 91  | 423   | 70    |     | 118 | 104 |    | 54 | 123 |    | 78    | 96  | 62  |     | 48  | 35  |     |     | 146  |    |
| 14     |               |     | 160   |       |     | 43  | 31  |    |    | 397 |    |       | 57  | 126 |     | 176 |     |     | 33  | 397  | 29 |
| 15     |               | 160 | 437   | 119   | 52  | 111 | 98  |    | 38 | 131 |    | 78    | 268 | 236 |     | 184 | 42  |     |     | 612  |    |
| 16     |               |     | 375   | 64    | 61  | 80  | 86  |    | 52 | 346 |    | 105   | 131 | 257 |     | 366 | 54  |     | 70  | 875  | 50 |
| 17     |               |     | 231   | 49    | 29  | 35  | 35  |    |    | 65  |    |       |     | 42  |     | 45  |     |     |     | 141  |    |
| 18     | 155           | 127 | 478   | 99    |     | 137 | 136 |    | 66 | 433 |    | 158   | 290 | 261 |     | 151 | 101 |     |     | 632  | 26 |
| 19     | 158           | 76  | 356   | 48    | 48  | 150 | 80  |    | 41 | 179 |    | 63    | 69  | 137 |     | 112 | 41  |     |     | 324  |    |
| 20     | 119           |     | 286   |       | 48  | 65  | 58  |    | 29 | 100 |    | 55    | 88  | 62  |     | 54  | 30  |     |     | 156  |    |
| 21     | 184           | 138 | 482   | 73    | 77  | 71  | 84  |    | 95 | 201 |    | 90    | 79  | 93  |     | 124 | 135 |     |     | 279  | 30 |
| 22     | 186           | 130 | 380   | 63    | 54  | 71  | 83  |    | 40 | 187 |    | 67    | 105 | 210 |     | 137 | 35  |     |     | 485  |    |
| 23     | 187           |     | 415   |       | 48  | 114 | 90  |    | 50 | 253 |    | 86    | 143 | 277 |     | 190 | 52  |     |     | 555  |    |
| 24     | 142           | 139 | 342   | 60    | 60  | 70  | 91  |    | 62 | 314 |    | 76    | 80  | 820 |     | 276 | 42  |     | 62  | 2817 | 30 |
| 25     | 179           | 129 | 446   | 66    | 58  | 116 | 94  |    | 79 | 176 | 78 | 214   | 193 | 258 |     | 160 | 101 |     |     | 493  |    |
| 26     | 108           |     | 271   |       | 32  | 51  | 53  |    | 45 | 88  |    | 74    | 77  | 88  |     | 45  | 36  |     |     | 155  |    |

Table SI-3, continued.

| Sample | PCB congeners |     |       |       |     |     |     |    |     |     |     |       |     |     |     |     |     |     |      |     |
|--------|---------------|-----|-------|-------|-----|-----|-----|----|-----|-----|-----|-------|-----|-----|-----|-----|-----|-----|------|-----|
|        | 18            | 22  | 28+31 | 41+64 | 44  | 49  | 52  | 54 | 70  | 74  | 87  | 90+10 | 95  | 99  | 104 | 105 | 110 | 114 | 118  | 123 |
| 27     | 269           | 208 | 945   | 160   | 182 | 219 | 226 |    | 308 | 344 | 101 | 434   | 297 | 236 |     | 176 | 218 |     | 512  | 34  |
| 28     | 51            |     | 199   |       |     |     | 35  |    |     | 71  | 28  | 61    | 66  | 98  |     | 55  |     |     | 187  |     |
| 29     |               |     | 76    |       |     |     |     |    |     | 47  |     |       |     | 68  |     | 60  |     |     | 138  |     |
| 30     | 109           | 82  | 283   |       | 73  | 58  | 142 |    | 87  | 349 | 38  | 61    | 76  | 109 |     | 149 | 35  | 28  | 345  |     |
| 31     |               | 162 | 369   |       |     | 46  | 38  |    |     | 31  |     |       | 156 |     |     |     |     |     | 55   |     |
| 32     | 56            |     | 145   |       |     | 47  |     |    |     | 91  |     |       | 43  | 120 |     | 70  |     |     | 244  |     |
| 33     |               |     | 240   |       |     | 86  | 36  |    |     | 108 |     |       | 81  | 150 |     | 95  |     |     | 295  |     |
| 34     | 93            |     | 251   |       | 37  | 56  | 53  |    | 47  | 236 | 27  | 62    | 61  | 221 |     | 119 | 38  |     | 437  |     |
| 35     | 49            |     | 169   |       |     | 76  | 35  |    |     | 215 | 26  |       |     | 123 |     | 92  |     |     | 250  |     |
| 36     |               |     | 151   |       |     |     | 26  |    |     | 110 | 40  |       | 48  | 161 |     | 117 | 44  |     | 333  |     |
| 37     |               | 109 | 144   |       |     | 27  |     |    | 32  | 38  |     |       |     |     |     |     |     |     |      |     |
| 38     |               |     | 166   |       |     |     | 25  |    | 33  | 127 | 24  | 65    | 71  | 90  |     | 78  | 34  |     | 214  |     |
| 39     | 41            |     | 136   |       |     | 55  | 35  |    | 23  | 50  |     | 49    | 58  | 58  |     | 34  | 31  |     | 109  |     |
| 40     |               | 87  | 205   |       | 30  | 101 | 46  |    | 34  | 163 | 61  | 86    | 89  | 313 |     | 232 | 56  |     | 700  |     |
| 41     | 2208          |     | 158   |       |     | 73  | 39  |    | 42  | 60  |     | 61    | 53  | 155 |     |     |     |     | 417  |     |
| 42     | 70            |     | 226   |       | 21  | 45  | 42  |    | 29  | 147 |     | 63    | 67  | 110 |     | 70  | 26  |     | 230  |     |
| 43     | 190           | 89  | 461   |       | 57  | 80  | 85  |    | 63  | 272 |     | 130   | 163 | 174 |     | 91  | 51  |     | 344  |     |
| 44     |               |     | 122   |       |     |     |     |    | 29  | 431 |     |       |     | 193 |     | 116 |     |     | 428  |     |
| 45     | 472           | 178 | 1069  | 76    | 131 | 101 | 175 |    | 96  | 296 |     | 184   | 198 | 134 |     | 70  | 69  |     | 252  |     |
| 46     |               |     | 140   |       |     |     |     |    |     | 64  |     |       |     | 40  |     | 47  |     |     | 102  |     |
| 47     |               | 119 | 318   |       |     | 59  | 59  |    |     | 141 |     |       | 77  | 115 |     | 132 |     |     | 228  |     |
| 48     |               |     | 120   |       |     |     | 26  |    |     | 90  |     |       |     | 72  |     | 37  |     |     | 149  |     |
| 49     |               | 141 | 431   | 102   | 62  | 145 | 196 |    | 69  | 205 | 109 | 189   | 169 | 413 |     | 447 | 131 |     | 1153 |     |
| 50     | 186           | 85  | 492   |       | 75  | 123 | 104 |    | 72  | 522 | 80  | 157   | 156 | 321 |     | 224 | 87  | 43  | 794  | 29  |
| 51     |               | 172 | 267   |       |     | 69  | 37  |    |     | 34  |     |       | 82  |     |     |     |     |     | 35   |     |
| 52     |               |     | 180   |       |     | 30  |     |    |     | 26  | 25  |       | 49  | 32  |     |     |     |     | 78   |     |
| 53     |               | 67  | 196   |       |     | 32  | 36  |    | 25  | 250 |     | 80    | 65  | 409 |     | 196 | 37  |     | 937  |     |

Table SI-3, continued.

| Sample | PCB congeners |     |     |     |         |     |      |     |      |     |      |     |       |      |     |     |     |     |      | ΣPCB | 180/(28+31) |       |     |
|--------|---------------|-----|-----|-----|---------|-----|------|-----|------|-----|------|-----|-------|------|-----|-----|-----|-----|------|------|-------------|-------|-----|
|        | 138           | 141 | 149 | 151 | 153+132 | 155 | 156  | 157 | 158  | 167 | 170  | 174 | 180   | 183  | 187 | 188 | 189 | 194 | 199  |      |             | 203   |     |
| 1      | 296           |     |     |     | 348     |     | 42   |     | 38   | 32  | 121  |     | 175   | 39   |     |     |     |     |      |      | 1949        |       |     |
| 2      | 312           |     |     |     | 461     |     |      |     |      |     | 159  |     | 209   | 51   |     |     |     |     |      |      | 2497        | 0.8   |     |
| 3      | 230           |     |     |     | 293     |     | 36   | 20  | 28   | 24  | 150  |     | 128   | 31   |     |     |     |     |      |      | 1495        | 1.0   |     |
| 4      | 540           | 109 | 493 | 187 | 788     |     | 39   |     | 46   | 31  | 176  | 137 | 324   | 115  | 192 |     |     | 39  |      | 59   | 5252        | 1.1   |     |
| 5      | 215           |     |     |     | 223     |     |      |     |      |     | 177  |     | 61    |      |     |     |     |     |      |      | 1600        | 0.2   |     |
| 6      | 296           |     | 79  |     | 395     |     | 34   |     | 31   | 31  | 91   |     | 162   | 40   |     |     |     |     |      |      | 3295        | 0.4   |     |
| 7      | 399           |     | 84  | 34  | 527     |     | 86   | 37  | 56   | 60  | 99   |     | 198   | 57   |     |     |     |     |      | 29   | 3526        | 0.6   |     |
| 8      | 177           |     |     |     | 235     |     |      |     |      |     | 99   |     | 107   | 28   |     |     |     |     |      |      | 1524        | 0.3   |     |
| 9      | 504           |     | 127 | 49  | 549     |     | 65   | 30  | 57   | 36  | 209  | 28  | 170   | 55   | 35  |     |     |     |      | 33   | 4376        | 0.5   |     |
| 10     | 358           |     |     |     | 395     |     | 49   |     | 35   |     | 151  |     | 122   |      |     |     |     |     |      |      | 2143        | 0.7   |     |
| 11     | 566           |     |     |     | 725     |     | 62   |     | 61   | 45  | 155  |     | 264   | 64   |     |     |     |     |      |      | 2702        | 1.8   |     |
| 12     | 163           |     | 100 | 49  | 247     |     |      |     |      |     | 46   |     | 83    | 27   |     |     |     |     |      |      | 2318        | 0.2   |     |
| 13     | 253           |     | 111 | 49  | 334     |     | 30   |     | 33   | 31  | 67   |     | 113   | 34   | 31  |     |     |     |      |      | 2715        | 0.3   |     |
| 14     | 405           |     |     |     | 489     |     | 191  | 107 | 68   | 116 | 194  |     | 294   | 76   |     |     |     | 46  |      | 69   | 3506        | 1.8   |     |
| 15     | 793           |     | 123 | 47  | 891     |     | 201  | 86  | 128  | 119 | 284  | 40  | 337   | 98   | 38  |     |     |     | 42   | 44   | 5838        | 0.8   |     |
| 16     | 926           |     | 137 | 53  | 947     |     | 407  | 215 | 170  | 233 | 426  | 50  | 393   | 150  |     |     |     |     |      | 51   | 99          | 7229  | 1.0 |
| 17     | 183           |     |     |     | 246     |     | 37   |     | 24   | 32  | 139  | 30  | 194   | 52   |     |     |     |     |      | 43   | 46          | 1696  | 0.8 |
| 18     | 759           | 54  | 303 | 104 | 965     |     | 125  | 36  | 85   | 66  | 269  | 81  | 328   | 98   | 97  |     |     |     |      | 28   | 43          | 6692  | 0.7 |
| 19     | 332           |     | 85  | 40  | 397     |     | 84   | 41  | 54   | 58  | 134  |     | 152   | 41   |     |     |     |     |      | 26   | 26          | 3352  | 0.4 |
| 20     | 217           |     | 92  | 48  | 260     |     | 30   |     | 33   | 26  | 63   |     | 76    |      |     |     |     |     |      |      |             | 1996  | 0.3 |
| 21     | 347           |     | 115 | 55  | 406     |     | 55   | 31  | 54   | 54  | 57   |     | 145   | 39   |     |     |     |     |      |      |             | 3594  | 0.3 |
| 22     | 636           |     | 111 | 43  | 734     |     | 64   | 29  | 63   | 40  | 117  |     | 253   | 66   | 40  |     |     |     |      |      | 26          | 4456  | 0.7 |
| 23     | 713           |     | 117 | 51  | 814     |     | 65   |     | 73   | 38  | 322  |     | 238   | 64   |     |     |     |     |      |      | 37          | 4991  | 0.6 |
| 24     | 10007         |     | 145 | 42  | 15043   |     | 1193 | 144 | 1127 | 610 | 6198 | 31  | 12113 | 2362 | 66  |     |     | 183 | 1304 |      | 1306        | 57357 | 35  |
| 25     | 653           | 106 | 332 | 139 | 849     |     | 46   |     | 72   | 37  | 122  | 74  | 252   | 91   | 104 |     |     |     |      |      | 31          | 5746  | 0.6 |
| 26     | 210           |     | 111 | 44  | 273     |     |      |     |      |     | 34   |     | 72    | 30   |     |     |     |     |      |      |             | 1896  | 0.3 |

Table SI-3, continued.

| Sample | PCB congeners |     |     |     |         |     |     |     |     |     |     |     |     |     |     |     |     |     |     | EPCB | 180/(28+31) |     |
|--------|---------------|-----|-----|-----|---------|-----|-----|-----|-----|-----|-----|-----|-----|-----|-----|-----|-----|-----|-----|------|-------------|-----|
|        | 138           | 141 | 149 | 151 | 153+132 | 155 | 156 | 157 | 158 | 167 | 170 | 174 | 180 | 183 | 187 | 188 | 189 | 194 | 199 |      |             | 203 |
| 27     | 1004          | 189 | 823 | 933 | 1441    |     | 63  |     | 94  | 29  | 131 | 176 | 379 | 150 | 233 |     |     | 30  |     | 52   | 10015       | 0.4 |
| 28     | 202           |     |     |     | 263     |     |     |     | 27  |     | 32  |     | 82  |     |     |     |     |     |     |      | 1456        | 0.4 |
| 29     | 132           |     |     |     | 152     |     |     |     |     |     |     |     |     |     |     |     |     |     |     |      | 672         |     |
| 30     | 345           |     |     |     | 302     |     | 96  | 45  | 41  | 39  | 104 |     | 132 |     |     |     |     | 31  |     |      | 3159        | 0.5 |
| 31     |               |     |     |     | 119     |     | 38  |     |     |     |     | 31  |     |     |     |     |     |     |     |      | 1046        |     |
| 32     | 272           |     |     |     | 328     |     |     |     | 32  |     | 56  |     | 259 |     |     |     |     |     |     |      | 1763        | 1.8 |
| 33     | 311           |     |     |     | 326     |     |     |     |     |     |     |     | 65  |     |     |     |     |     |     |      | 1794        | 0.3 |
| 34     | 481           |     | 82  | 31  | 492     |     | 49  |     | 57  | 27  | 67  |     | 141 | 85  |     |     |     |     |     |      | 3250        | 0.6 |
| 35     | 299           |     |     |     | 326     |     | 57  |     | 41  | 31  | 84  |     | 128 | 34  |     |     |     |     |     |      | 2035        | 0.8 |
| 36     | 351           |     |     | 55  | 467     |     | 61  | 40  | 46  | 53  | 81  |     | 109 | 38  |     |     |     |     |     |      | 2330        | 0.7 |
| 37     |               |     |     |     |         |     |     |     |     |     |     |     |     |     |     |     |     |     |     |      | 350         |     |
| 38     | 355           |     | 92  | 41  | 470     |     | 82  |     | 50  | 28  | 41  |     | 177 | 54  |     |     |     |     |     |      | 2317        | 1.1 |
| 39     | 171           |     |     |     | 219     |     |     |     |     |     | 32  |     | 71  | 24  |     |     |     |     |     |      | 1195        | 0.5 |
| 40     | 559           |     | 113 | 46  | 602     |     | 80  |     | 89  | 31  | 66  |     | 133 | 44  |     |     |     |     |     |      | 3969        | 0.6 |
| 41     | 278           |     | 70  |     | 464     |     | 47  |     |     |     | 59  |     | 131 |     |     |     |     |     |     |      | 4315        | 0.8 |
| 42     | 239           |     | 90  | 35  | 299     |     | 41  |     | 33  | 22  | 46  |     | 95  | 26  |     |     |     |     |     |      | 2073        | 0.4 |
| 43     | 442           |     | 140 | 65  | 578     |     | 60  |     | 47  | 37  | 84  |     | 184 | 62  | 42  |     |     |     |     | 51   | 4044        | 0.4 |
| 44     | 390           |     |     |     | 428     |     | 64  |     | 54  | 35  | 66  |     | 136 | 37  |     |     | 101 |     |     |      | 2630        | 1.1 |
| 45     | 279           |     | 189 | 96  | 426     |     |     |     | 28  |     |     |     | 87  |     |     |     |     |     |     |      | 4609        | 0.1 |
| 46     | 126           |     |     |     | 201     |     | 45  |     |     |     |     |     | 178 |     |     |     |     |     |     |      | 942         | 1.3 |
| 47     | 185           |     |     |     | 295     |     |     |     |     |     |     |     |     |     |     |     |     |     |     |      | 1728        |     |
| 48     | 151           |     |     |     | 200     |     | 24  |     | 32  |     |     |     | 53  |     |     |     |     |     |     |      | 954         | 0.4 |
| 49     | 960           |     |     | 152 | 787     |     | 140 |     | 118 | 50  | 68  |     | 136 | 62  | 80  |     |     |     |     |      | 6517        | 0.9 |
| 50     | 1052          | 37  | 236 | 92  | 1288    |     | 174 | 51  | 144 | 93  | 261 |     | 546 | 162 | 448 |     | 754 | 51  |     | 71   | 9009        | 1.1 |
| 51     | 79            | 37  |     | 75  | 122     |     |     |     |     |     |     |     |     |     |     |     |     |     |     |      | 1009        |     |
| 52     | 141           |     |     | 74  | 223     |     |     |     |     |     |     | 36  | 44  |     | 116 |     |     |     |     |      | 1055        | 0.2 |
| 53     | 1657          |     | 97  |     | 2194    |     | 120 |     | 181 | 86  | 257 |     | 652 | 208 | 123 |     |     | 31  |     | 59   | 7993        | 3.3 |
